# Supplementary material for: An Investigation of Healthcare Professionals’ Motivation in Public and Mission Hospitals in Meru County, Kenya
Source: MDPI journal article supplement (doi:10.3390/healthcare8040530), 2020-12-02
Supplement: s1 [file s1]

# **An investigation of healthcare professionals' motivation in public and mission hospitals in Meru County, Kenya.**

**Supplementary file 1: Detailed tables of Frequencies, percentages and relative importance indices of all the 23 questions.**

## **Authors**

Rose Nabi Deborah Karimi Muthuri\*<sup>1</sup>, Flavia Senkubuge<sup>1</sup> and Charles Hongoro<sup>1,2,3,4</sup>.

## **Authors affiliation**

<sup>1</sup>School of Health Systems and Public Health (SHSPH), Faculty of Health Sciences, University of Pretoria, Pretoria, South Africa.

<sup>2</sup>Developmental, Capable and Ethical State Division, Human Sciences Research Council (HSRC), Pretoria, South Africa.

<sup>3</sup> Faculty of Science, Tshwane University of Technology, Tshwane, South Africa.

<sup>4</sup>Faculty of Health Sciences, Fort Hare University, Alice, South Africa.

\*Corresponding author: Rose Nabi Deborah Karimi Muthuri (**Email:**[u19391189@tuks.co.za](mailto:u19391189@tuks.co.za))

**Table S1.** Motivational outcomes and 23 questions with median, mean and standard deviation scores

| Motivational outcome       | Questions                                                                            | Median | Mean scores<br>(5-point Likert Scale) | Standard<br>deviation |
|----------------------------|--------------------------------------------------------------------------------------|--------|---------------------------------------|-----------------------|
| General motivation         | These days, I feel motivated to work as hard as I can.                               | 4      | 3.65                                  | 1.20                  |
|                            | I only do this job so that I get paid at the end of the month.                       | 4      | 3.69*                                 | 1.21                  |
|                            | I do this job as it provides long term security for me.                              | 3      | 2.80*                                 | 1.22                  |
| Burnout                    | I feel emotionally drained at the end of every day.                                  | 4      | 3.32*                                 | 1.20                  |
|                            | Sometimes when I get up in the morning, I dread having to face another day at work.  | 4      | 3.39*                                 | 1.20                  |
| Job satisfaction           | Overall, I am very satisfied with my job.                                            | 4      | 3.65                                  | 1.13                  |
|                            | I am not satisfied with my colleagues in my ward.                                    | 4      | 4.06*                                 | 1.10                  |
|                            | I am satisfied with my supervisor.                                                   | 4      | 3.73                                  | 1.07                  |
| Intrinsic job satisfaction | I am satisfied with the opportunity to use my abilities in my job.                   | 4      | 4.12                                  | 0.94                  |
|                            | I am satisfied that I accomplish something worthwhile in this job.                   | 4      | 4.24                                  | 0.84                  |
|                            | I do not think that my work in the hospital is valuable these days.                  | 5      | 4.11*                                 | 1.18                  |
| Organizational commitment  | I am proud to be working for this hospital.                                          | 4      | 3.92                                  | 0.97                  |
|                            | I find that my values and this hospital's values are very similar.                   | 4      | 3.50                                  | 1.00                  |
|                            | I am glad that I work for this facility rather than other facilities in the country. | 4      | 3.44                                  | 1.08                  |
|                            | I feel very little commitment to this hospital.                                      | 2      | 2.33*                                 | 1.04                  |
|                            | This hospital really inspires me to do my very best on the job.                      | 4      | 3.30                                  | 1.09                  |
| Conscientiousness          | I cannot be relied on by my colleagues at work.                                      | 5      | 4.37*                                 | 1.05                  |
|                            | I always complete my tasks efficiently and correctly.                                | 4      | 4.23                                  | 0.88                  |
|                            | I am a hard worker.                                                                  | 5      | 4.50                                  | 0.73                  |
|                            | I do things that need doing without being asked or told.                             | 5      | 4.37                                  | 0.85                  |
| Timeliness and attendance  | I am punctual about coming to work.                                                  | 4      | 4.20                                  | 0.92                  |
|                            | I am often absent from work.                                                         | 5      | 4.25*                                 | 1.10                  |
|                            | It is not a problem if I sometimes come late to work.                                | 5      | 4.18*                                 | 1.04                  |

\* The scale for negatively worded questions was reversed thus, 1 (strongly agree) to 5 (strongly disagree). Therefore, a higher score shows disagreement with negative statement and thus, implying higher motivation.

**Table S2.** Relative importance indices for all 23 motivation questions

| Question                                                                                 | Strongly Agree | Agree | Neutral | Disagree | Strongly Disagree | Total | Total number | A*N  | RII   | Rank |
|------------------------------------------------------------------------------------------|----------------|-------|---------|----------|-------------------|-------|--------------|------|-------|------|
| 1. These days, I feel motivated to work as hard as I can.                                | 745            | 824   | 273     | 136      | 39                | 2017  | 553          | 2765 | 0,729 | 10   |
| 2. I only do this job so that I get paid at the end of the month.                        | 205            | 200   | 357     | 342      | 172               | 1276  | 553          | 2765 | 0,461 | 17   |
| 3. I do this job as it provides long term security for me.                               | 420            | 664   | 420     | 208      | 59                | 1771  | 553          | 2765 | 0,641 | 14   |
| 4. I feel emotionally drained at the end of every day.                                   | 250            | 384   | 372     | 388      | 89                | 1483  | 553          | 2765 | 0,536 | 15   |
| 5. Sometimes when I get up in the morning, I dread having to face another day at work.   | 200            | 392   | 393     | 344      | 112               | 1441  | 553          | 2765 | 0,521 | 16   |
| 6. Overall, I am very satisfied with my job.                                             | 700            | 796   | 375     | 118      | 30                | 2019  | 553          | 2765 | 0,730 | 9    |
| 7. I am not satisfied with my colleagues in my ward.                                     | 85             | 204   | 198     | 336      | 251               | 1074  | 553          | 2765 | 0,388 | 18   |
| 8. I am satisfied with my supervisor.                                                    | 670            | 916   | 366     | 80       | 28                | 2060  | 553          | 2765 | 0,745 | 7    |
| 9. I am satisfied with the opportunity to use my abilities in my job.                    | 1075           | 964   | 165     | 62       | 11                | 2277  | 553          | 2765 | 0,824 | 5    |
| 10. I am satisfied that I accomplish something worthwhile in this job.                   | 1270           | 884   | 204     | 26       | 6                 | 2390  | 553          | 2765 | 0,864 | 3    |
| 11. I do not think that my work in the hospital is valuable these days.                  | 125            | 196   | 174     | 258      | 292               | 1045  | 553          | 2765 | 0,378 | 19   |
| 12. I am proud to be working for this hospital.                                          | 830            | 936   | 327     | 60       | 14                | 2167  | 553          | 2765 | 0,784 | 6    |
| 13. I find that my values and this hospital's values are very similar.                   | 385            | 916   | 489     | 122      | 23                | 1935  | 553          | 2765 | 0,700 | 12   |
| 14. I am glad that I work for this facility rather than other facilities in the country. | 455            | 784   | 495     | 140      | 31                | 1905  | 553          | 2765 | 0,689 | 13   |
| 15. I feel very little commitment to this hospital.                                      | 620            | 876   | 402     | 112      | 20                | 2030  | 553          | 2765 | 0,734 | 8    |
| 16. This hospital really inspires me to do my very best on the job.                      | 490            | 832   | 465     | 118      | 33                | 1938  | 553          | 2765 | 0,701 | 11   |
| 17. I cannot be relied on by my colleagues at work.                                      | 90             | 128   | 102     | 228      | 355               | 903   | 553          | 2765 | 0,327 | 23   |
| 18. I always complete my tasks efficiently and correctly.                                | 1235           | 904   | 156     | 36       | 10                | 2341  | 553          | 2765 | 0,847 | 4    |
| 19. I am a hard worker.                                                                  | 1710           | 648   | 111     | 20       | 2                 | 2491  | 553          | 2765 | 0,901 | 1    |
| 20. I do things that need doing without being asked or told.                             | 1530           | 716   | 132     | 34       | 7                 | 2419  | 553          | 2765 | 0,875 | 2    |
| 21. I am punctual about coming to work.                                                  | 45             | 108   | 171     | 428      | 246               | 998   | 553          | 2765 | 0,361 | 21   |
| 22. I am often absent from work.                                                         | 115            | 116   | 171     | 244      | 322               | 968   | 553          | 2765 | 0,350 | 22   |
| 23. It is not a problem if I sometimes come late to work.                                | 55             | 180   | 174     | 320      | 279               | 1008  | 553          | 2765 | 0,365 | 20   |
